# Supplementary material for: Boron-doped reduced graphene oxide-based bimetallic Ni/Fe nanohybrids for the rapid dechlorination of trichloroethylene
Source: Royal Society of Chemistry journal article supplement (doi:10.1039/c6en00575f), 2017-01-01
Supplement: c6en00575f1.pdf [file c6en00575f1.pdf]

## **Electronic Supporting Information**

### **Boron doped reduced graphene oxide based bimetallic Ni/Fe nanohybrids for rapid dechlorination of trichloroethylene**

Rama Shanker Sahu<sup>1</sup>, Kartick Bindumadhvan<sup>2</sup> and Ruey-an Doong<sup>1, 2\*</sup>

1. Department of Biomedical Engineering and Environmental Sciences, National Tsing-Hua University, Hsinchu, 30013, Taiwan
2. Institute of Environmental Engineering, National Chiao Tung University, Hsinchu, 30010, Taiwan.

\*Corresponding author. 1001 University Rd., Institute of Environmental Engineering, National Chiao Tung University, Hsinchu, 30010, Taiwan. Tel: +886-3-5712121 ext 55505. Fax: +886-3-5725958.

E-mail address: [radoong@nctu.edu.tw](mailto:radoong@nctu.edu.tw); [radoong@mx.nthu.edu.tw](mailto:radoong@mx.nthu.edu.tw)

Table S1 Determination of composition of B-rGO/Fe/Ni from thermogravimetry.

| <b>Materials</b> | <b>Initial weight (%)</b> | <b>Residual weight (%)</b> | <b>Residue</b>   | <b>Weight ratio</b> |
|------------------|---------------------------|----------------------------|------------------|---------------------|
| B-rGO            | 100                       | 38.3                       | Boron and carbon | 100%                |
| B-rGO/Fe/Ni      | 100                       | 76.9                       | Boron and carbon | 37.4%               |
|                  |                           |                            | Fe/Ni bimetal    | 62.6%               |

Table S2. The comparison of pseudo-first order rate constant ( $k_{\text{obs}}$ ) for TCE dechlorination by bimetallic Fe/Ni nanoparticles immobilized onto different supports under anoxic conditions.

| Bimetallic nanomaterials           | pH        | $k_{\text{obs}}$ ( $\text{h}^{-1}$ ) | References |
|------------------------------------|-----------|--------------------------------------|------------|
| Free Fe/Ni                         |           | 8.2                                  |            |
| B-rGO/Fe/Ni (5%)                   | 7.0       | 10.9                                 | This study |
| B-rGO/Fe/Ni (5%) (mass normalized) |           | 18.1                                 |            |
| Zeolite/Fe/Ni                      | N.A       | 2.2                                  | 38         |
| Fe/Ni (10%)                        | 6.5       | 1.2                                  |            |
| Fe/Ni (22%)                        | 7.0       | 3.0                                  | 39         |
| Fe/Ni (50%)                        | 7.5       | 0.36                                 |            |
| Polystyrene resin/Fe/Ni (10%)      |           | 5.84                                 |            |
| Polystyrene resin/Fe/Ni (20%)      | 7.0       | 6.95                                 | 25         |
| Polystyrene resin/Fe/Ni (25%)      |           | 6.40                                 |            |
| Fe/Ni/nylon-66                     |           | 6.47                                 |            |
| Fe/Ni/PVDF                         | 7.0       | 1.77                                 | 8          |
| Fe/Ni/MCEM                         |           | 1.04                                 |            |
| Fe/Ni/Millex GS membranes          |           | 0.56                                 |            |
| Free Fe/Ni (5%)                    | 8.2 ± 0.1 | 0.0984                               | 40         |
| Bentonite/Fe/Ni (5%)               |           | 0.181                                |            |

N.A.: not available.

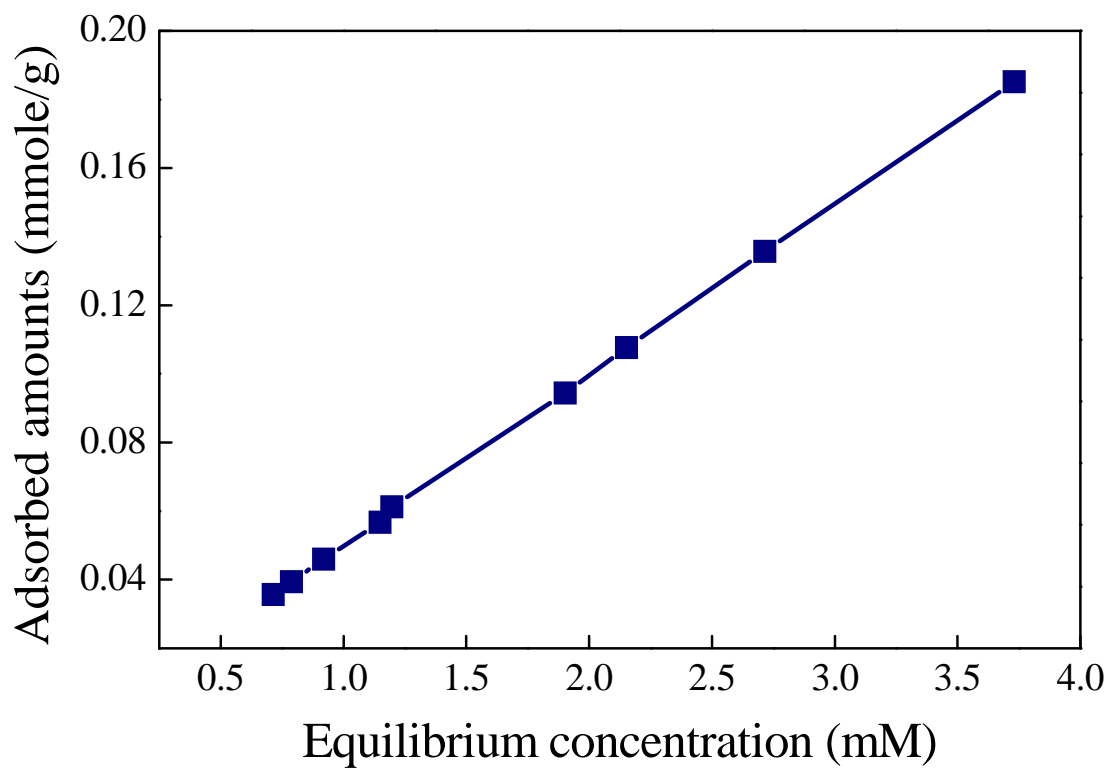

Figure S1 Adsorption isotherm of ferric ions by B-rGO under anoxic conditions .

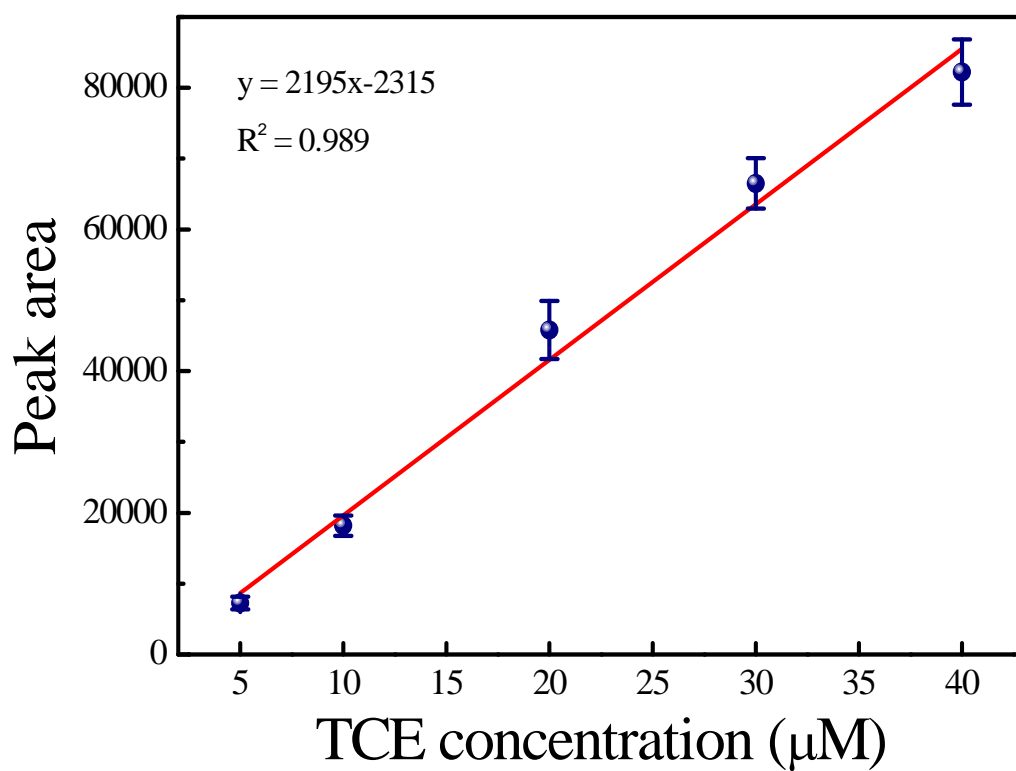

Figure S2. The calibration curve of TCE prepared by using the external standard method with the known concentrations of TCE in aqueous solutions.

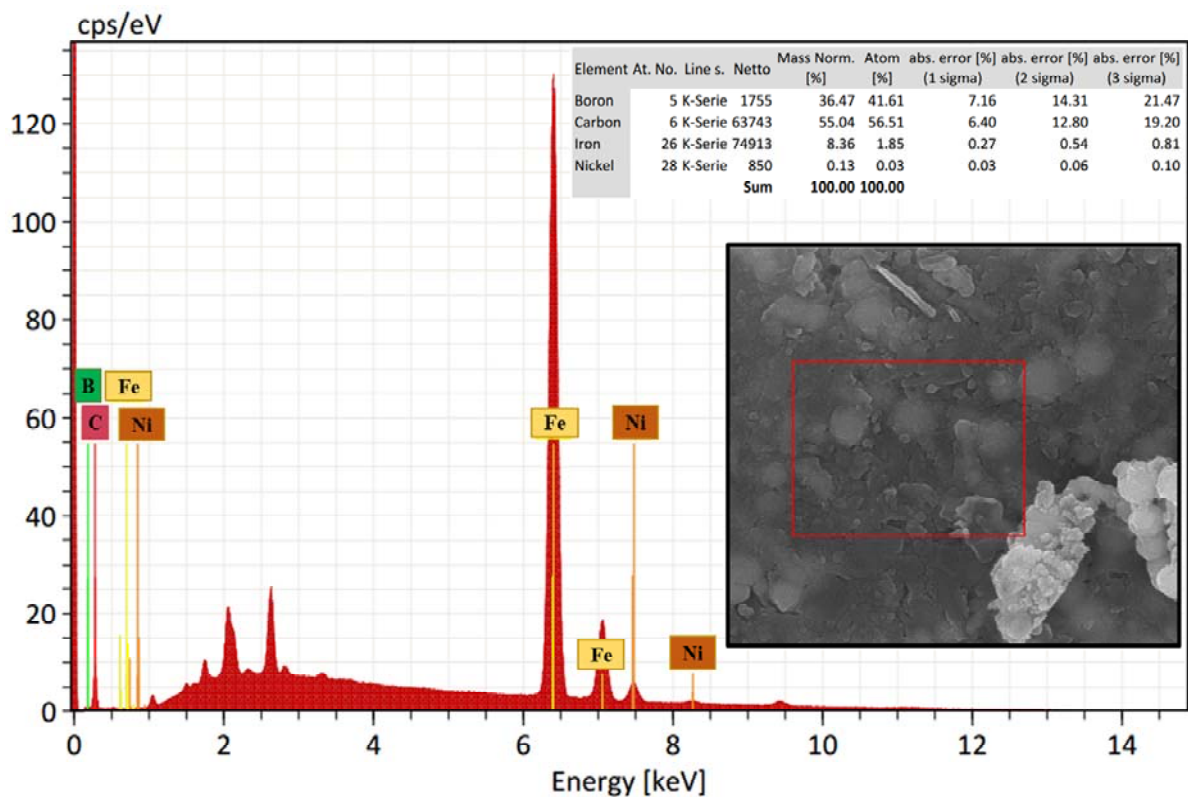

Figure S3. The energy-dispersive X-ray spectra (EDS) of B-rGO/Fe/Ni nanocomposites. Inset is the analytical area of SEM image for EDS.

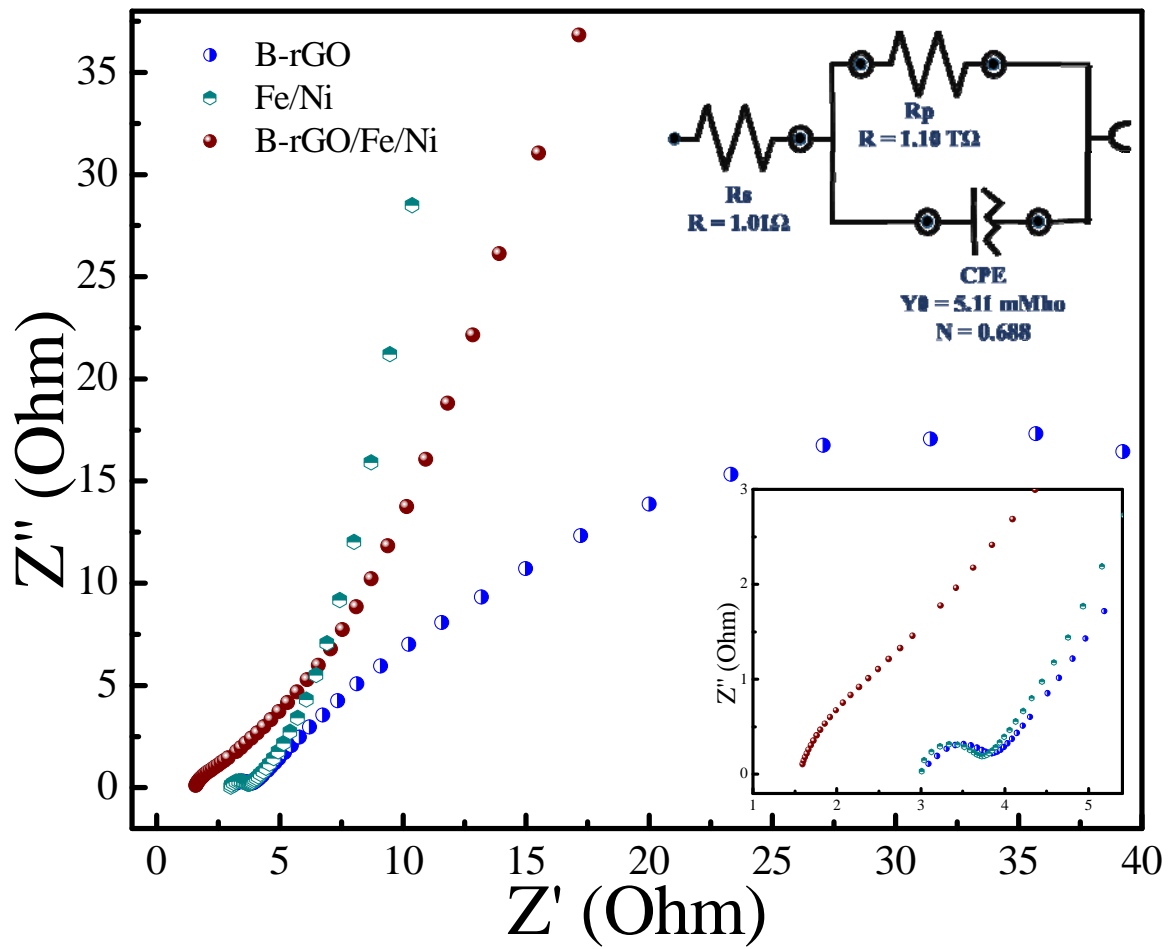

Figure S4. The Nyquist plot of B-rGO, Fe/Ni and B-rGO/Fe/Ni nanocomposites by using 1.0 M  $\text{Na}_2\text{SO}_4$  as the electrolyte.

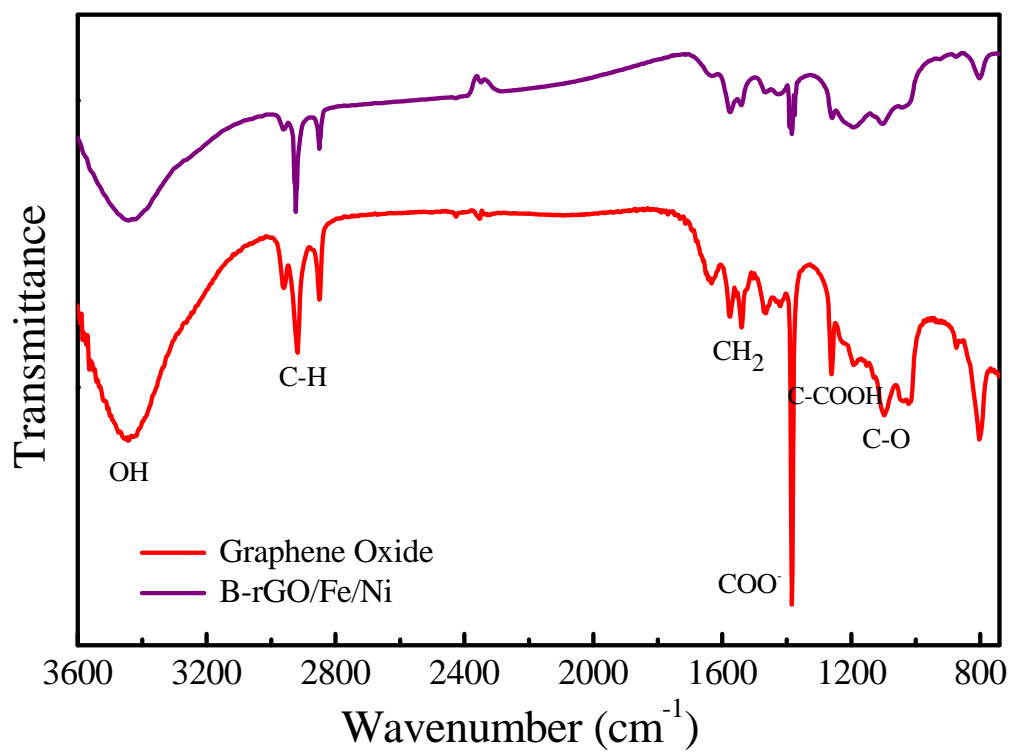

Figure S5. FTIR spectra of GO and B-rGO/Fe/Ni nanocomposites.



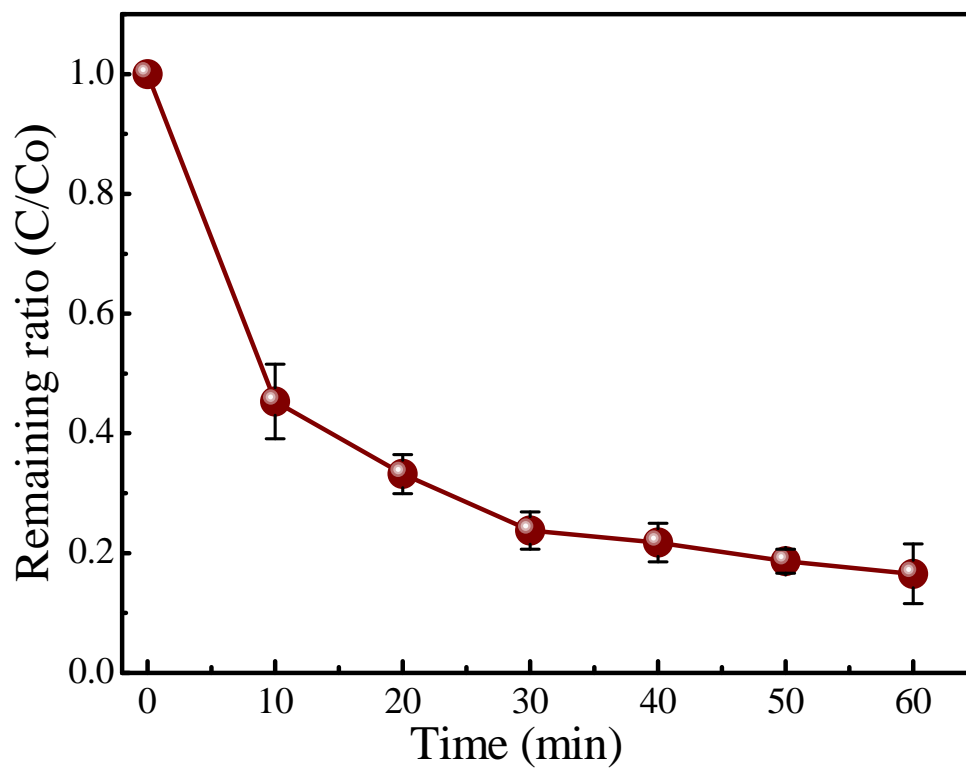

Figure S6. Dechlorination of 20  $\mu\text{M}$  TCE by 1.0 g/L graphene oxide immobilized Fe/Ni nanocomposite at pH 7 under anoxic conditions.

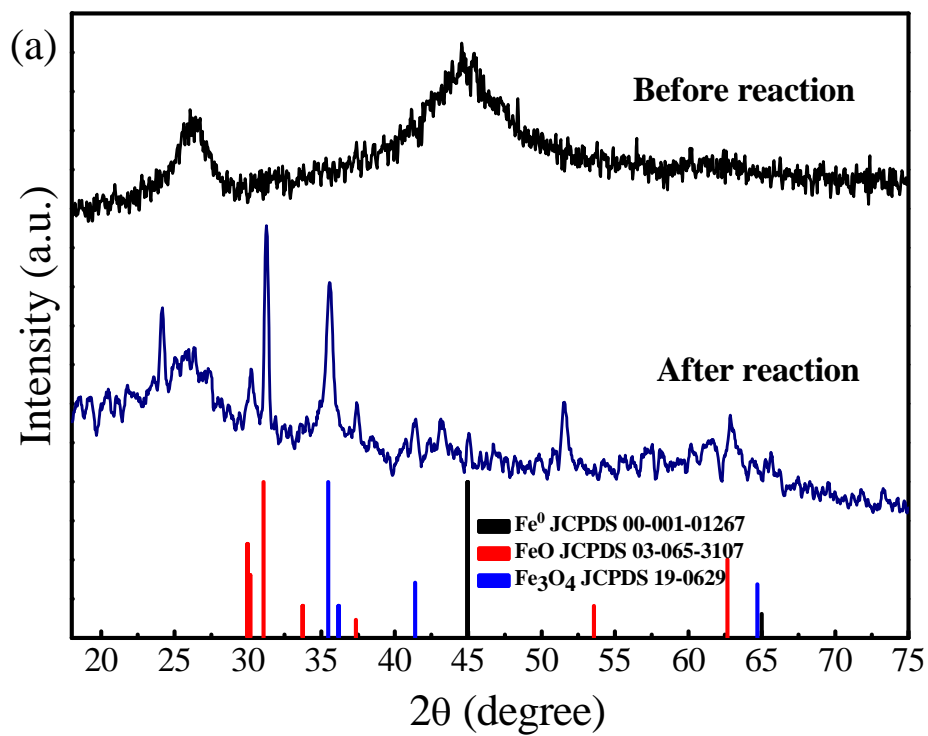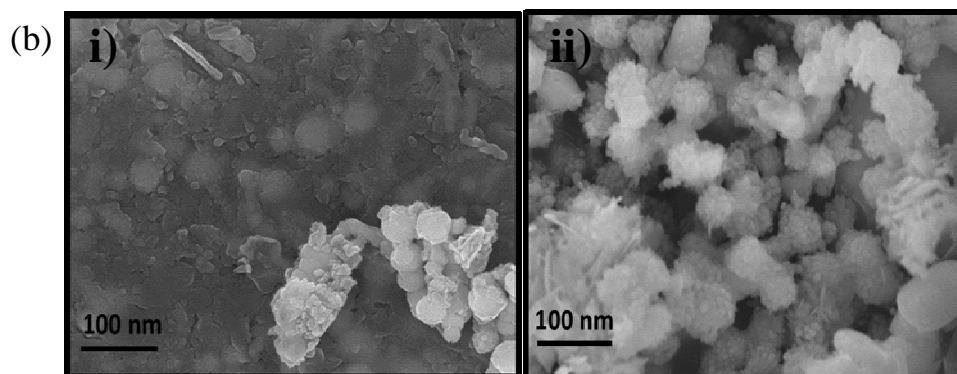

Figure S7. The (a) XRD patterns and (b) SEM images of B-rGO/Fe/Ni nanocomposite before and after the dechlorination of TCE at pH 7 under anoxic conditions.
